# Supplementary material for: Spacer optimization of new conjugates for a melanoma-selective delivery approach
Source: Royal Society of Chemistry journal article supplement (doi:10.1039/c3ob41428k), 2013-01-01
Supplement: c3ob41428k.pdf [file c3ob41428k.pdf]

## Supporting Information for

# Spacer optimization of new conjugates for a melanoma-selective delivery approach

Mathieu André,<sup>a,b</sup> Sébastien Tarrit,<sup>a,b</sup> Marie-Joelle Couret,<sup>a,b</sup> Marie-Josèphe Galmier,<sup>a,b</sup> Eric Débiton,<sup>a,b</sup>  
Jean-Michel Chezal<sup>a,b</sup> and Emmanuelle Mounetou\*<sup>a,b</sup>

<sup>a</sup>INSERM - Université d'Auvergne UMR 990, IMTV, BP 184, F-63005 Clermont-Ferrand Cedex,  
France. E-mail: emmanuelle.mounetou@inserm.fr; Phone: (33) 4 73 15 08 00.

<sup>b</sup>Clermont Université, Université d'Auvergne, IMTV, BP 10448, F-63005 Clermont-Ferrand Cedex,  
France

## Table of Contents

|                                                                           |    |
|---------------------------------------------------------------------------|----|
| Synthesis .....                                                           | 2  |
| Synthesis of the vinyl ether precursors ( <b>11a-d</b> ) .....            | 2  |
| General procedure for the preparation of compounds ( <b>12a-d</b> ) ..... | 5  |
| General procedure for the preparation of compounds ( <b>13a-d</b> ) ..... | 8  |
| General procedure for the preparation of compounds ( <b>14a-d</b> ) ..... | 10 |
| General procedure for the preparation of compounds ( <b>15a-d</b> ) ..... | 12 |
| Synthesis of the tertiary amine precursors ( <b>18-19</b> ) .....         | 14 |
| Metabolic stability (Table S1) .....                                      | 17 |

## Experimental

### Synthesis of the vinyl ethers precursors (11a-d).

**2-[2-(vinylloxy)ethoxy]ethyl-4-toluenesulfonate (9).** In a mortar,  $K_2CO_3$  (11 g) was wet with diethyleneglycol monovinyl ether (3 g, 22.70 mmol) and TsCl (6.492 g, 34.05 mmol) was added and the mixture was grinded with a pestle for 10 minutes. KOH (3.184 g, 56.75 mmol) was added and the mixture was grinded with a mortar for 3 minutes.  $Et_2O$  (50 mL) was added and the mixture was filtered. The solid was rinsed with DCM (2 x 25 mL), the filtrates were combined and concentrated *in vacuo*. After column chromatography on silica gel (EtOAc-cyclohexane, 25-75, v-v) the pure product was obtained as a colourless fragrant oil (4.906 g, 75%).  $R_f$  0.31 (EtOAc-cyclohexane, 25-75, v-v);  $^1H$  NMR:  $\delta$  2.45 (3H, s,  $ArCH_3$ ), 3.64-3.79 (6H, m,  $OCH_2CH_2O$ ,  $OCH_2CH_2OTs$ ), 4.01 (1H, dd,  $J$  7.1, 2.1, H 'trans' to O), 4.15 (1H, dd,  $J$  14.0, 2.1, H 'cis' to O), 4.18 (2H, t,  $J$  5.3,  $OCH_2CH_2OTs$ ), 6.46 (1H, dd,  $J$  14.0, 7.1,  $H_2C=CH$ ), 7.34 (2H, d,  $J$  8.2, 2 x  $ArH$  'o' to  $CH_3$ ), 7.80 (2H, d,  $J$  8.2, 2 x  $ArH$  'm' to  $CH_3$ );  $^{13}C$  NMR:  $\delta$  21.7 ( $ArCH_3$ ), 67.2 ( $OCH_2CH_2O$ ), 68.8, 69.8 ( $OCH_2CH_2O$ ,  $OCH_2CH_2OTs$ ), 69.3 ( $OCH_2CH_2OTs$ ), 86.9 ( $H_2C=CH$ ), 128.1 (2 x  $ArCH$  'm' to  $CH_3$ ), 129.9 (2 x  $ArCH$  'o' to  $CH_3$ ), 133.0 ( $ArCSO_2O$ ), 144.9 ( $ArCCH_3$ ), 151.7 ( $H_2C=CH$ ).

### General procedure for the preparation of oligoethyleneglycol monobenzoates (10c-d)

To a solution of dry oligoethyleneglycol, DIPEA (1 equivalent) and DMAP (0.05 equivalents) in anhydrous DCM (10 mL / mmol) was added a solution of  $BzCl$  (0.6 equivalents) in anhydrous DCM (1.5 mL / mmol). The mixture was stirred for 16 h at rt, poured into DCM (12 mL / mmol) then washed with 2% aq.  $Na_2CO_3$  (12 mL / mmol) and water (12 mL / mmol). The aqueous layers were combined and extracted with DCM (5 mL / mmol). The organic layers were combined, dried over  $MgSO_4$  and concentrated *in vacuo*.

**2-{2-[2-(2-hydroxyethoxy)ethoxy]ethoxy}ethyl benzoate (10c).** Prepared from tetraethylene glycol (10 g, 20.59 mmol). After column chromatography on silica gel (EtOAc-DCM-EtOH, 70-26-4, v-v-v)

the pure product was obtained as a colourless oil (3.115 g, 81%).  $R_f$  0.28 (EtOAc-DCM-EtOH, 70-26-4, v-v-v);  $^1\text{H}$  NMR:  $\delta$  2.47 (1H, br s, OH), 3.57-3.75 (12H, m, HOCH<sub>2</sub>CH<sub>2</sub>O, 2 x OCH<sub>2</sub>CH<sub>2</sub>O), 3.84 (2H, t,  $J$  5.2, OCH<sub>2</sub>CH<sub>2</sub>OBz), 4.49 (2H, t,  $J$  5.2, OCH<sub>2</sub>CH<sub>2</sub>OBz), 7.39-7.48 (2H, m, 2 x ArH 'm' to COO), 7.52-7.60 (1H, m, ArH 'p' to COO), 8.03-8.10 (2H, m, 2 x ArH 'o' to COO);  $^{13}\text{C}$  NMR:  $\delta$  61.7 (HOCH<sub>2</sub>CH<sub>2</sub>O), 64.2 (OCH<sub>2</sub>CH<sub>2</sub>OBz), 69.3 (OCH<sub>2</sub>CH<sub>2</sub>OBz), 70.4-70.7 (2 x OCH<sub>2</sub>CH<sub>2</sub>O), 72.5 (HOCH<sub>2</sub>CH<sub>2</sub>O), 128.3 (2 x ArCH 'm' to COO), 129.7 (2 x ArCH 'o' to COO), 130.1 (ArCCOO), 133.0 (ArCH 'p' to COO), 166.6 (COO).

**23-hydroxy-3,6,9,12,15,18,21-heptaoxatricos-1-yl benzoate (10c).** Prepared from octaethylene glycol (2.486 g, 6.71 mmol). After column chromatography on silica gel (DCM-EtOH, 93-7, v-v) the pure product was obtained as a colourless oil (1.477 g, 46%).  $R_f$  0.32 (DCM-EtOH, 93-7, v-v);  $^1\text{H}$  NMR:  $\delta$  2.56 (1H, br s, OH), 3.58-3.72 (28H, m, HOCH<sub>2</sub>CH<sub>2</sub>O, 6 x OCH<sub>2</sub>CH<sub>2</sub>O), 3.83 (2H, t,  $J$  5.2, OCH<sub>2</sub>CH<sub>2</sub>OBz), 4.47 (2H, t,  $J$  5.2, OCH<sub>2</sub>CH<sub>2</sub>OBz), 7.39-7.47 (2H, m, 2 x ArH 'm' to COO), 7.52-7.60 (1H, m, ArH 'p' to COO), 8.03-8.08 (2H, m, 2 x ArH 'o' to COO);  $^{13}\text{C}$  NMR:  $\delta$  61.6 (HOCH<sub>2</sub>CH<sub>2</sub>O), 64.1 (OCH<sub>2</sub>CH<sub>2</sub>OBz), 69.2 (OCH<sub>2</sub>CH<sub>2</sub>OBz), 70.3-70.6 (2 x OCH<sub>2</sub>CH<sub>2</sub>O), 72.5 (HOCH<sub>2</sub>CH<sub>2</sub>O), 128.3 (2 x ArCH 'm' to COO), 129.6 (2 x ArCH 'o' to COO), 130.1 (ArCCOO), 133.0 (ArCH 'p' to COO), 166.5 (COO).

**2-(vinyloxy)ethyl acetate (11a).** To a solution of ethyleneglycol monovinyl ether (2 g, 22.70 mmol), pyridine (2.75 mL, 34.05 mmol) and DMAP (0.277 g, 3.27 mmol) in anhydrous DCM (60 mL) was added Ac<sub>2</sub>O (3.2 mL, 34.05 mmol). The mixture was stirred for 1 h 30 at rt then poured into a mixture of water (100 mL) and sat. aq. NaHCO<sub>3</sub> (100 mL) which was extracted with DCM (40 mL then 2 x 100 mL). The organic layers were combined, dried over MgSO<sub>4</sub> and concentrated *in vacuo*. After column chromatography on silica gel (EtOAc-cyclohexane, 10-90, v-v) the pure product (**11a**) was obtained as a colourless oil (2.658 g, 90%).  $R_f$  0.28 (EtOAc-cyclohexane, 10-90, v-v);  $^1\text{H}$  NMR:  $\delta$  11.40 (3H, s, OCOCH<sub>3</sub>), 3.88 (2H, t,  $J$  5.2, OCH<sub>2</sub>CH<sub>2</sub>OCO), 4.05 (1H, dd,  $J$  7.2, 2.0, H 'trans' to O), 4.20 (1H, dd,  $J$  14.1, 2.0, H 'cis' to O), 4.31 (2H, t,  $J$  5.2, OCH<sub>2</sub>CH<sub>2</sub>OCO), 6.49 (1H, dd,  $J$  14.1, 7.2, H<sub>2</sub>C=CH);  $^{13}\text{C}$

NMR:  $\delta$  20.9 (CH<sub>3</sub>), 62.7 (OCH<sub>2</sub>CH<sub>2</sub>OCO), 65.8 (OCH<sub>2</sub>CH<sub>2</sub>OCO), 87.1 (H<sub>2</sub>C=CH), 151.4 (H<sub>2</sub>C=CH), 170.9 (OCOCH<sub>3</sub>).

**2-[(1-méthyl)vinyl]oxy]ethyl benzoate (11b).** This compound was prepared according to the literature procedure.<sup>17</sup>

### General procedure for the preparation of compounds (11c-d)

To a solution of the relevant oligoethyleneglycol monobenzoate (**10c-d**) in anhydrous THF (20 mL / mmol) was added NaH (60% in mineral oil, 2 equivalents) and the mixture was stirred for 45 minutes at rt and a solution of the sulfonate (**9**) (1.3 equivalents) in anhydrous THF (4 mL / mmol) was added and the mixture was stirred for 20 h at reflux then poured into DCM (70 mL / mmol) and washed with water (2 x 30 mL / mmol). The combined aqueous layers were extracted with DCM (15 mL / mmol), the organic layers were combined and washed with brine (2 x 30 mL / mmol), dried over MgSO<sub>4</sub> and concentrated *in vacuo*.

**3,6,9,12,15,18-hexaoxaicos-19-en-1-yl benzoate (11c).** Prepared from 2-(2-(2-(2-hydroxyethoxy)ethoxy)ethoxy)ethyl benzoate (2.233 g, 7.49 mmol). After column chromatography on silica gel (DCM-EtOH, 96-4, v-v) the pure product (**11c**) and its free alcohol analogue were obtained as colourless fragrant oils (1.203 g, 39% and 1.304 g, 56%). The latter was converted into (**11c**) with a quantitative benzylation, leading to a combined yield of 95%. *R*<sub>f</sub> 0.31 (DCM-EtOH, 96-4, v-v); <sup>1</sup>H NMR:  $\delta$  3.61-3.86 (22H, m, 5 x OCH<sub>2</sub>CH<sub>2</sub>O, OCH<sub>2</sub>CH<sub>2</sub>OBz), 4.00 (1H, dd, *J* 7.2, 2.1, H 'trans' to O), 4.17 (1H, dd, *J* 14.2, 2.1, H 'cis' to O), 4.47 (2H, t, *J* 5.2, OCH<sub>2</sub>CH<sub>2</sub>OTs), 6.49 (1H, dd, *J* 14.2, 7.2, H<sub>2</sub>C=CH), 7.39-7.48 (2H, m, 2 x ArH 'm' to COO), 7.52-7.61 (1H, m, ArH 'p' to COO), 8.03-8.09 (2H, m, 2 x ArH 'o' to COO); <sup>13</sup>C NMR:  $\delta$  64.2 (OCH<sub>2</sub>CH<sub>2</sub>OBz), 67.2 (H<sub>2</sub>C=CHOCH<sub>2</sub>CH<sub>2</sub>O), 69.2, 69.6 (H<sub>2</sub>C=CHOCH<sub>2</sub>CH<sub>2</sub>O, OCH<sub>2</sub>CH<sub>2</sub>OBz), 70.6-70.7 (5 x OCH<sub>2</sub>CH<sub>2</sub>), 86.6 (H<sub>2</sub>C=CH), 128.4 (2 x ArCH 'm' to COO), 129.7 (2 x ArCH 'o' to COO), 130.1 (ArCCOO), 133.0 (ArCH 'p' to COO), 151.8 (H<sub>2</sub>C=CH), 166.5 (ArCOO).

**3,6,9,12,15,18,21,24,27,30-decaoxadotriacont-31-en-1-yl benzoate (11d).** Prepared from 23-hydroxy-3,6,9,12,15,18,21-heptaoxatricos-1-yl benzoate (1.477 g, 3.11 mmol). After column chromatography on silica gel (DCM-EtOH, 93-7, v-v) the pure product (**11d**) and its free alcohol analogue were obtained as colourless fragrant oils (0.260 g, 14% and 0.318 g, 21%). The latter was converted into (**9d**) with a quantitative benzylation, leading to a combined yield of 35%.  $R_f$  0.29 (DCM-EtOH, 93-7, v-v);  $^1\text{H}$  NMR:  $\delta$  3.62-3.86 (38H, m, 9 x  $\text{OCH}_2\text{CH}_2\text{O}$ ,  $\text{OCH}_2\text{CH}_2\text{OBz}$ ), 3.94 (1H, dd,  $J$  7.2, 2.1, H 'trans' to O), 4.18 (1H, dd,  $J$  14.2, 2.1, H 'cis' to O), 4.48 (2H, t,  $J$  5.2,  $\text{OCH}_2\text{CH}_2\text{OTs}$ ), 6.50 (1H, dd,  $J$  14.2, 7.2,  $\text{H}_2\text{C}=\text{CH}$ ), 7.39-7.47 (2H, m, 2 x ArH 'm' to COO), 7.51-7.60 (1H, m, ArH 'p' to COO), 8.03-8.07 (2H, m, 2 x ArH 'o' to COO);  $^{13}\text{C}$  NMR:  $\delta$  64.1 ( $\text{OCH}_2\text{CH}_2\text{OBz}$ ), 67.2 ( $\text{H}_2\text{C}=\text{CHOCH}_2\text{CH}_2\text{O}$ ), 69.2, 69.6 ( $\text{H}_2\text{C}=\text{CHOCH}_2\text{CH}_2\text{O}$ ,  $\text{OCH}_2\text{CH}_2\text{OBz}$ ), 70.6-70.7 (5 x  $\text{OCH}_2\text{CH}_2$ ), 86.2 ( $\text{H}_2\text{C}=\text{CH}$ ), 128.3 (2 x ArCH 'm' to COO), 129.7 (2 x ArCH 'o' to COO), 130.1 (ArCCOO), 133.0 (ArCH 'p' to COO), 157.7 ( $\text{H}_2\text{C}=\text{CH}$ ), 166.5 (ArCOO).

### General procedure for the preparation of compounds (**12a-d**)

To a solution of (**6**) and camphorsulfonic acid (0.04 equivalents) in anhydrous THF (10 mL / mmol) was added a solution of the corresponding vinyl ether (**9a-d**) in anhydrous THF (5 mL / mmol). The mixture was stirred for different time for different times at rt then poured into a mixture of water (30 mL / mmol (**6**)) and sat. aq.  $\text{NaHCO}_3$  (15 mL / mmol (**6**)) which was extracted with DCM (3 x 15 mL / mmol). The organic layers were combined, dried over  $\text{MgSO}_4$  and concentrated *in vacuo*.

#### **3'-O-{1-[2-(acetyloxy)ethoxy]ethyl}-5-iodo-5'-O-triisopropylsilyl-2'-deoxyuridine (12a).**

Prepared from (**6**) (1.5 g, 2.94 mmol) and vinyl ether (**11a**) (1.147 g, 8.82 mmol). Reaction time: 5 h. After column chromatography on silica gel (EtOAc-cyclohexane, 35-65, v-v) the pure product (**12a**) was obtained as a white solid (1.859 g, 99%). Mp 96-98 °C;  $R_f$  0.24 (EtOAc-cyclohexane, 35-65, v-v);  $^1\text{H}$  NMR:  $\delta$  1.09-1.29 (21H, m, 3 x  $i\text{Pr}$ ), 1.35 (3H, d,  $J$  5.0,  $\text{O}[\text{CHCH}_3]\text{O}$ ), 2.03-2.13 (4H, m, H-2',  $\text{OCOCH}_3$ ), 2.43-2.54 (1H, m, H-2'), 3.61-3.92 (4H, m, H-5',  $\text{OCH}_2\text{CH}_2\text{OCO}$ ), 3.96-4.25 (3H, m, H-4',

OCH<sub>2</sub>CH<sub>2</sub>OCO), 4.44-4.51 (1H, m, H-3'), 4.85 (1H, q, *J* = 5.0, O[CHCH<sub>3</sub>]O), 6.18-6.25 (1H, m, H-1'), 8.04 (1H, s, H-6), 8.36 (1H, br s, NH); <sup>13</sup>C NMR: δ 12.0 (Si[CH(CH<sub>3</sub>)<sub>2</sub>]<sub>3</sub>), 18.2 (Si[CH(CH<sub>3</sub>)<sub>2</sub>]<sub>3</sub>), 20.0 (O[CHCH<sub>3</sub>]O), 41.0 (C-2'), 62.2, 63.5, 63.7 (C-5', OCH<sub>2</sub>CH<sub>2</sub>OCO), 68.7 (C-5), 74.9 (C-3'), 85.7 (C-1'), 86.2 (C<sub>4'</sub>), 99.2 (O[CHCH<sub>3</sub>]O), 144.1 (C-6), 150.1 (C-2 C=O), 160.1 (C-4 C=O), 171.0 (OCOCH<sub>3</sub>); *m/z* (ESI) 639.05 [M - H]<sup>-</sup>.

**3'-O-(1-(2-(benzoyloxy)ethoxy)-1-méthylethyl)-5-iodo-5'-O-triisopropylsilyl-2'-deoxyuridine**

**(12b).** Prepared from **(6)** (1.5 g, 2.94 mmol) and vinyl ether **(11b)** (1.818 g, 8.82 mmol). Reaction time: 4 h. After column chromatography on silica gel (EtOAc-cyclohexane, 35-65, v-v) the pure product **(10a)** was obtained as a white foam (0.851 g, 40%). *R<sub>f</sub>* 0.31 (EtOAc-cyclohexane, 35-65, v-v); <sup>1</sup>H NMR: δ 1.03-1.25 (21H, m, 3 x <sup>*i*</sup>Pr), 1.37 (6H, s, O[C(CH<sub>3</sub>)<sub>2</sub>]O), 2.00-2.08 (1H, m, H-2'), 2.38-2.48 (1H, m, H-2'), 3.73-3.86 (4H, m, H-5', OCH<sub>2</sub>CH<sub>2</sub>OCO), 4.06-4.08 (1H, m, H-4'), 4.40-4.53 (3H, m, H-3', OCH<sub>2</sub>CH<sub>2</sub>OCO), 6.21 (dd, 1H, *J* 7.8, 5.1, H-1'), 7.35-7.42 (2H, m, 2 x ArH '*m*' to COO), 7.49-7.53 (1H, m, ArH '*p*' to COO), 7.94 (1H, s, H-6), 7.97-8.01 (2H, m, 2 x ArH '*o*' to COO), 9.81 (1H, br s, NH); <sup>13</sup>C NMR: δ 11.9 (Si[CH(CH<sub>3</sub>)<sub>2</sub>]<sub>3</sub>), 18.1 (Si[CH(CH<sub>3</sub>)<sub>2</sub>]<sub>3</sub>), 25.4-25.7 (O[C(CH<sub>3</sub>)<sub>2</sub>]O), 40.5 (C-2'), 59.6 (OCH<sub>2</sub>CH<sub>2</sub>OCO), 63.4 (C-5'), 64.2 (OCH<sub>2</sub>CH<sub>2</sub>OCO), 68.7 (C-5), 71.1 (C-3'), 85.8 (C-1'), 87.0 (C-4'), 101.2 (O[C(CH<sub>3</sub>)<sub>2</sub>]O), 128.4 (2 x ArCH '*m*' to COO), 129.6 (2 x ArCH '*o*' to COO), 130.0 (ArCCOO), 133.1 (ArCH '*p*' to COO), 144.1 (C-6), 150.2 (C-2 C=O), 160.2 (C-4 C=O), 166.5 (OCOPh).

**5-iodo-3'-O-(1-methyl-21-oxo-21-phenyl-2,5,8,11,14,17,20-heptaaxahenicos-1-yl)-5'-O-**

**triisopropylsilyl-2'-deoxyuridine (12c).** Prepared from **(6)** (1.411 g, 2.92 mmol) and vinyl ether **(11c)** (1.710 g, 4.15 mmol). Reaction time: 18 h. After column chromatography on silica gel (EtOAc-DCM, 65-35, v-v) the pure product **(12c)** was obtained as a light yellow oil (2.358 g, 92%). *R<sub>f</sub>* 0.27 (EtOAc-DCM, 65-35, v-v); <sup>1</sup>H NMR: δ 1.06-1.25 (21H, m, 3 x <sup>*i*</sup>Pr), 1.32 (3H, d, *J* 5.0, O[CHCH<sub>3</sub>]O), 1.91-2.16 (1H, m, H-2'), 2.38-2.55 (1H, m, H-2'), 3.55-3.74 (20H, m, 5 x OCH<sub>2</sub>CH<sub>2</sub>O), 3.83 (2H, t, *J* 5.2, OCH<sub>2</sub>CH<sub>2</sub>OCOPh), 3.83-4.14 (3H, m, H-4', H-5'), 4.39-4.45 (1H, m, H-3'), 4.47 (2H, t, *J* 5.2,

OCH<sub>2</sub>CH<sub>2</sub>OCOPh), 4.82 (1H, q, *J* = 5.0, O[CHCH<sub>3</sub>]O), 6.20 (dd, 1H, *J* 8.1, 5.7, H-1'), 7.38-7.47 (2H, m, 2 x ArH 'm' to COO), 7.51-7.60 (1H, m, ArH 'p' to COO), 8.01-8.08 (3H, m, H-6, 2 x ArH 'p' to COO), 8.74 (1H, br s, NH); <sup>13</sup>C NMR: δ 11.9 (Si[CH(CH<sub>3</sub>)<sub>2</sub>]<sub>3</sub>), 18.1 (Si[CH(CH<sub>3</sub>)<sub>2</sub>]<sub>3</sub>), 20.0 (O[CHCH<sub>3</sub>]O), 39.2 (C-2'), 63.3 (C-5'), 63.7 (O[CHCH<sub>3</sub>]OCH<sub>2</sub>), 64.2 (OCH<sub>2</sub>CH<sub>2</sub>OCOPh), 68.6 (C-5), 69.2 (OCH<sub>2</sub>CH<sub>2</sub>OCOPh), 70.5-70.7 (O[CHCH<sub>3</sub>]OCH<sub>2</sub>CH<sub>2</sub>, 4 x OCH<sub>2</sub>CH<sub>2</sub>O), 74.7 (C-3'), 85.6 (C-1'), 86.0 (C-4'), 99.3 (O[CHCH<sub>3</sub>]O), 128.3 (2 x ArCH 'm' to COO), 129.7 (2 x ArCH 'o' to COO), 130.1 (ArCCOO), 133.0 (ArCH 'p' to COO), 144.0 (C-6), 150.0 (C-2 C=O), 160.1 (C-4 C=O), 166.5 (OCOPh).

**5-iodo-3'-O-(1-methyl-33-oxo-33-phényl-2,5,8,11,14,17,20,23,26,29,32-undecaoxidotritriacont-1-yl)-5'-O-triisopropylsilyl-2'-deoxyuridine (12d).** Prepared from (6) (0.500 g, 0.98 mmol) and vinyl ether (11d) (0.633 g, 1.08 mmol). Reaction time: 20 h. After column chromatography on silica gel (EtOAc-DCM-EtOH, 80-20-5, v-v-v) the pure product (12d) was obtained as a light yellow oil (0.595 g, 55%). *R*<sub>f</sub> 0.31 (EtOAc-DCM-EtOH, 80-20-5, v-v-v); <sup>1</sup>H NMR: δ 1.08-1.29 (21H, m, 3 x <sup>i</sup>Pr), 1.31 (3H, d, *J* 5.0, O[CHCH<sub>3</sub>]O), 1.92-2.17 (1H, m, H-2'), 2.39-2.56 (1H, m, H-2'), 3.53-3.79 (36H, m, 9 x OCH<sub>2</sub>CH<sub>2</sub>O), 3.81-4.14 (5H, m, H-4', H-5', OCH<sub>2</sub>CH<sub>2</sub>OCOPh), 4.47 (2H, t, *J* 5.3, OCH<sub>2</sub>CH<sub>2</sub>OCOPh), 4.83 (1H, q, *J* 5.0, O[CHCH<sub>3</sub>]O), 6.20 (dd, 1H, *J* 8.0, 5.8, H-1'), 7.36-7.49 (2H, m, 2 x ArH 'm' to COO), 7.52-7.60 (1H, m, ArH 'p' to COO), 8.02-8.09 (3H, m, H-6, 2H, m, 2 x ArH 'o' to COO), 8.61 (1H, br s, NH); <sup>13</sup>C NMR: δ 11.9 (Si[CH(CH<sub>3</sub>)<sub>2</sub>]<sub>3</sub>), 18.2 (Si[CH(CH<sub>3</sub>)<sub>2</sub>]<sub>3</sub>), 20.0 (O[CHCH<sub>3</sub>]O), 39.6 (C-2'), 63.3 (C-5'), 63.7 (O[CHCH<sub>3</sub>]OCH<sub>2</sub>), 64.2 (OCH<sub>2</sub>CH<sub>2</sub>OCOPh), 68.6 (C-5), 69.2 (OCH<sub>2</sub>CH<sub>2</sub>OCOPh), 70.5-70.7 (O[CHCH<sub>3</sub>]OCH<sub>2</sub>CH<sub>2</sub>, 8 x OCH<sub>2</sub>CH<sub>2</sub>O), 74.8 (C-3'), 85.7 (C-1'), 86.0 (C-4'), 99.4 (O[CHCH<sub>3</sub>]O), 128.4 (2 x ArCH 'm' to COO), 129.6 (2 x ArCH 'o' to COO), 130.1 (ArCCOO), 133.0 (ArCH 'p' to COO), 144.1 (C-6), 150.1 (C-2 C=O), 160.0 (C-4 C=O), 166.6 (OCOPh).

## General procedure for the preparation of compounds (13a-d)

To a solution of (**12a-d**) in anhydrous EtOH (20 mL / mmol) was added LiOH (1.5 equivalents). The mixture was stirred for different times at rt then poured into a mixture of 5% aq. Na<sub>2</sub>CO<sub>3</sub> (80 mL / mmol) and sat. aq. NaCl (30 mL / mmol) which was extracted with DCM (4 x 30 mL / mmol). The organic layers were combined, dried over MgSO<sub>4</sub> and concentrated *in vacuo*.

**3'-O-[1-(2-hydroxyethoxy)ethyl]-5-iodo-5'-O-triisopropylsilyl-2'-deoxyuridine (13a)**. Prepared from (**12a**) (1.959 g, 2.94 mmol). Reaction time: 1 h. After column chromatography on silica gel (EtOAc-cyclohexane, 80-20, v-v) the pure product (**11a**) was obtained as a colourless caramel (1.630 g, 93%). *R<sub>f</sub>* 0.29 (EtOAc-cyclohexane, 80-20, v-v); <sup>1</sup>H NMR: δ 1.06-1.19 (21H, m, 3 x <sup>i</sup>Pr), 1.37 (3H, d, *J* 5.0, O[CHCH<sub>3</sub>]O), 1.93-2.13 (2H, H-2', OH), 2.43-2.63 (1H, m, H-2'), 3.52-3.76 (2H, m, OCH<sub>2</sub>CH<sub>2</sub>OCO), 3.71-3.75 (2H, m, OCH<sub>2</sub>CH<sub>2</sub>OCO), 3.82-3.98 (2H, m, H-5'), 3.95-4.15 (1H, m, H-4'), 4.43-4.55 (1H, m, H-3'), 4.87 (1H, q, *J* = 5.0, O[CHCH<sub>3</sub>]O), 6.18-6.25 (1H, m, H-1'), 8.04 (1H, s, H-6), 8.63 (1H, br s, NH); <sup>13</sup>C NMR: δ 12.0 (Si[CH(CH<sub>3</sub>)<sub>2</sub>]<sub>3</sub>), 18.2 (Si[CH(CH<sub>3</sub>)<sub>2</sub>]<sub>3</sub>), 20.1 (O[CHCH<sub>3</sub>]O), 39.6 (C-2'), 61.9 (OCH<sub>2</sub>CH<sub>2</sub>OCO), 63.5 (C-5'), 66.0 (OCH<sub>2</sub>CH<sub>2</sub>OCO), 68.7 (C-5), 75.3 (C-3'), 86.1 (C-1'), 86.5 (C-4'), 99.4 (O[CHCH<sub>3</sub>]O), 144.2 (C-6), 150.1 (C-2 C=O), 160.0 (C-4 C=O); *m/z* (ESI) 596.98 [M - H]<sup>-</sup>.

**3'-O-[1-(2-hydroxyethoxy)-1-methylethyl]-5-iodo-5'-O-triisopropylsilyl-2'-deoxyuridine (13b)**. Prepared from (**12b**) (0.851 g, 1.19 mmol). Reaction time: 4 h. After column chromatography on silica gel (EtOAc-cyclohexane, 70-30, v-v) the pure product (**11a**) was obtained as a white foam (0.632 g, 87%). *R<sub>f</sub>* 0.31 (EtOAc-cyclohexane, 70-30, v-v); <sup>1</sup>H NMR: δ 1.09-1.29 (21H, m, 3 x <sup>i</sup>Pr), 1.39 (6H, s, O[C(CH<sub>3</sub>)<sub>2</sub>]O), 1.95 (1H, t, *J* 5.9, OH), 2.00-2.09 (1H, m, H-2'), 2.40-2.49 (1H, m, H-2'), 3.55 (2H, t, *J* 5.2, OCH<sub>2</sub>CH<sub>2</sub>OH), 3.68-3.76 (2H, m, OCH<sub>2</sub>CH<sub>2</sub>OH), 3.84-4.01 (2H, m, H-5'), 4.02-4.11 (1H, m, H-4'), 4.56 (1H, d, *J* 5.9, H-3'), 6.24 (dd, 1H, *J* 8.8, 4.9, H-1'), 8.06 (1H, s, H-6), 8.44 (1H, br s, NH); <sup>13</sup>C NMR: δ 12.0 (Si[CH(CH<sub>3</sub>)<sub>2</sub>]<sub>3</sub>), 18.2 (Si[CH(CH<sub>3</sub>)<sub>2</sub>]<sub>3</sub>), 25.7, 25.8 (O[C(CH<sub>3</sub>)<sub>2</sub>]O), 40.7 (C-2'), 62.1



(OCH<sub>2</sub>CH<sub>2</sub>OH), 62.6 (OCH<sub>2</sub>CH<sub>2</sub>OH), 63.7 (C-5'), 68.7 (C-5), 71.4 (C-3'), 86.1 (C-1'), 87.2 (C-4'), 101.2 (O[C(CH<sub>3</sub>)<sub>2</sub>]O), 144.3 (C-6), 150.2 (C-2 C=O), 160.1 (C-4 C=O).

**3'-O-(19-hydroxy-1-methyl-2,5,8,11,14,17-hexaoxonadec-1-yl)- 5-iodo-5'-O-triisopropylsilyl-2'-deoxyuridine (13c).** Prepared from (12c) (1.477 g, 1.60 mmol). Reaction time: 3 h. After column chromatography on silica gel (DCM-EtOH, 92-8, v-v) the pure product (11c) was obtained as a colourless oil (1.294 g, 99%). *R<sub>f</sub>* 0.32 (DCM-EtOH, 92-8, v-v); <sup>1</sup>H NMR: δ 1.07-1.28 (21H, m, 3 x <sup>i</sup>Pr), 1.31 (3H, d, *J* 5.0, O[CHCH<sub>3</sub>]O), 1.93-2.19 (1H, m, H-2'), 2.41-2.60 (1H, m, H-2'), 2.78 (1H, t, *J* 5.7, OH), 3.60-3.73 (24H, m, 6 x OCH<sub>2</sub>CH<sub>2</sub>O), 3.83-3.97 (2H, m, H-5'), 3.99-4.14 (1H, m, H-4'), 4.38-4.52 (1H, m, H-3'), 4.82 (1H, q, *J* = 5.0, O[CHCH<sub>3</sub>]O), 6.20 (dd, 1H, *J* 8.3, 5.7, H-1'), 8.04 (1H, s, H-6), 8.59 (1H, br s, NH); <sup>13</sup>C NMR: δ 11.9 (Si[CH(CH<sub>3</sub>)<sub>2</sub>]<sub>3</sub>), 18.2 (Si[CH(CH<sub>3</sub>)<sub>2</sub>]<sub>3</sub>), 20.0 (O[CHCH<sub>3</sub>]O), 39.6 (C-2'), 61.7 (O[CHCH<sub>3</sub>]OCH<sub>2</sub>), 63.9 (C-5'), 68.7 (C-5), 70.3 (OCH<sub>2</sub>CH<sub>2</sub>OH), 70.5-70.7 (O[CHCH<sub>3</sub>]OCH<sub>2</sub>CH<sub>2</sub>, 4 x OCH<sub>2</sub>CH<sub>2</sub>O), 72.6 (OCH<sub>2</sub>CH<sub>2</sub>OH), 74.8 (C-3'), 85.6 (C-1'), 86.1 (C-4'), 99.4 (O[CHCH<sub>3</sub>]O), 144.1 (C-6), 150.0 (C-2 C=O), 160.2 (C-4 C=O).

**3'-O-(31-hydroxy-1-methyl-2,5,8,11,14,17,20,23,26,29-decaoxahentriacont-1-yl)-5-iodo-5'-O-triisopropylsilyl-2'-deoxyuridine (13d).** Prepared from (12d) (590 mg, 0.54 mmol). Reaction time: 3 h. After column chromatography on silica gel (DCM-EtOH, 90-10, v-v) the pure product (11d) was obtained as a colourless oil (0.423 g, 79%). *R<sub>f</sub>* 0.29 (DCM-EtOH, 90-10, v-v); <sup>1</sup>H NMR: δ 1.05-1.26 (21H, m, 3 x <sup>i</sup>Pr), 1.32 (3H, d, *J* 5.0, O[CHCH<sub>3</sub>]O), 1.92-2.17 (1H, m, H-2'), 2.40-2.58 (1H, m, H-2'), 2.52 (1H, t, *J* 5.7, OH), 3.60-3.73 (40H, m, 10 x OCH<sub>2</sub>CH<sub>2</sub>O), 3.81-3.95 (2H, m, H-5'), 3.97-4.16 (1H, m, H-4'), 4.34-4.50 (1H, m, H-3'), 4.84 (1H, q, *J* = 5.0, O[CHCH<sub>3</sub>]O), 6.21 (dd, 1H, *J* 8.3, 5.7, H-1'), 8.03 (1H, s, H-6), 8.75 (1H, br s, NH); <sup>13</sup>C NMR: δ 11.9 (Si[CH(CH<sub>3</sub>)<sub>2</sub>]<sub>3</sub>), 18.2 (Si[CH(CH<sub>3</sub>)<sub>2</sub>]<sub>3</sub>), 20.0 (O[CHCH<sub>3</sub>]O), 39.7 (C-2'), 61.7 (O[CHCH<sub>3</sub>]OCH<sub>2</sub>), 63.9 (C-5'), 68.7 (C-5), 70.4 (OCH<sub>2</sub>CH<sub>2</sub>OH), 70.5-70.7 (O[CHCH<sub>3</sub>]OCH<sub>2</sub>CH<sub>2</sub>, 8 x OCH<sub>2</sub>CH<sub>2</sub>O), 72.7 (OCH<sub>2</sub>CH<sub>2</sub>OH), 74.8 (C-3'), 85.7 (C-1'), 86.1 (C-4'), 99.4 (O[CHCH<sub>3</sub>]O), 144.1 (C-6), 150.1 (C-2 C=O), 160.2 (C-4 C=O).

## General procedure for the preparation of compounds (14a-d)

To a solution of (**13a-d**) and DIPEA (2.5 equivalents) in anhydrous DCM (12 mL / mmol) was added MsCl (1.2 equivalents). The mixture was stirred for 1 h at rt then poured into a mixture of water (110 mL / mmol) and sat. aq. NaCl (15 mL / mmol) which was extracted with DCM (3 x 40 mL / mmol). The organic layers were combined, dried over MgSO<sub>4</sub> and concentrated *in vacuo*.

### 5-iodo-3'-O-{1-[2-(methylsulfonyloxy)ethoxy]ethyl}- 5'-O-triisopropylsilyl-2'-deoxyuridine

(**14a**). Prepared from (**13a**) (1.630 g, 2.72 mmol). After column chromatography on silica gel (EtOAc-cyclohexane, 65-35, v-v) the pure product (**14a**) was obtained as a white foam (1.639 g, 89%). *R<sub>f</sub>* 0.29 (EtOAc-cyclohexane, 65-35, v-v); <sup>1</sup>H NMR: δ 1.09-1.26 (21H, m, 3 x <sup>i</sup>Pr), 1.36 (3H, d, *J* 5.0, O[CHCH<sub>3</sub>]O), 2.02-2.14 (1H, m, H-2'), 2.39-2.48 (1H, m, H-2'), 3.04 (3H, s, OSO<sub>2</sub>CH<sub>3</sub>), 3.67-4.15 (5H, m, H-4', H-5', OCH<sub>2</sub>CH<sub>2</sub>OSO<sub>2</sub>), 4.32-4.38 (2H, m, OCH<sub>2</sub>CH<sub>2</sub>OSO<sub>2</sub>), 4.43-4.50 (1H, m, H-3'), 4.86 (1H, q, *J* = 5.0, O[CHCH<sub>3</sub>]O), 6.20 (1H, dd, *J* = 7.9, 5.2, H-1'), 8.03 (1H, s, H-6), 8.36 (1H, br s, NH); <sup>13</sup>C NMR: δ 12.0 (Si[CH(CH<sub>3</sub>)<sub>2</sub>]<sub>3</sub>), 18.2 (Si[CH(CH<sub>3</sub>)<sub>2</sub>]<sub>3</sub>), 20.0 (O[CHCH<sub>3</sub>]O), 37.7 (OSO<sub>2</sub>CH<sub>3</sub>), 39.3, 39.8 (C-2'), 62.3 (C-5'), 63.4 (OCH<sub>2</sub>CH<sub>2</sub>OSO<sub>2</sub>), 68.9, 69.0 (C-5, OCH<sub>2</sub>CH<sub>2</sub>OSO<sub>2</sub>), 75.3 (C-3'), 85.7 (C-1'), 86.2 (C-4'), 99.4 (O[CHCH<sub>3</sub>]O), 144.1 (C-6), 150.2 (C-2 C=O), 160.2 (C-4 C=O); *m/z* (ESI) 675.02 [M - H]<sup>-</sup>.

### 5-iodo-3'-O-(1-methyl-1-{2-[(methylsulfonyl)oxy]ethoxy}ethyl)-5'-O-triisopropylsilyl-2'-

deoxyuridine (**14b**). Prepared from (**13b**) (0.632 g, 1.03 mmol). After column chromatography on silica gel (EtOAc-cyclohexane, 60-40, v-v) the pure product (**14b**) was obtained as a white foam (0.629 g, 88%). *R<sub>f</sub>* 0.34 (EtOAc-cyclohexane, 60-40, v-v); <sup>1</sup>H NMR: δ 1.09-1.29 (21H, m, 3 x <sup>i</sup>Pr), 1.39 (6H, s, O[C(CH<sub>3</sub>)<sub>2</sub>]O), 1.99-2.13 (1H, m, H-2'), 2.34-2.44 (1H, m, H-2'), 3.02 (3H, s, OSO<sub>2</sub>CH<sub>3</sub>), 3.55 (2H, t, *J* 5.1, OCH<sub>2</sub>CH<sub>2</sub>OMs), 3.83-3.95 (2H, m, H-5'), 3.99-4.00 (1H, m, H-4'), 4.32 (2H, t, *J* 5.1, OCH<sub>2</sub>CH<sub>2</sub>OMs), 4.56 (1H, d, *J* 6.2, H-3'), 6.23 (dd, 1H, *J* 8.9, 4.8, H-1'), 8.04 (1H, s, H-6), 8.44 (1H, br s, NH); <sup>13</sup>C NMR: δ 12.0 (Si[CH(CH<sub>3</sub>)<sub>2</sub>]<sub>3</sub>), 18.2 (Si[CH(CH<sub>3</sub>)<sub>2</sub>]<sub>3</sub>), 25.5, 25.7 (O[C(CH<sub>3</sub>)<sub>2</sub>]O), 37.5

(OSO<sub>2</sub>CH<sub>3</sub>), 40.5 (C-2'), 59.5 (OCH<sub>2</sub>CH<sub>2</sub>OMs), 63.5 (C-5'), 68.8 (C-5), 69.2 (OCH<sub>2</sub>CH<sub>2</sub>OMs), 71.4 (C-3'), 85.9 (C-1'), 87.0 (C-4'), 101.4 (O[C(CH<sub>3</sub>)<sub>2</sub>]O), 144.1 (C-6), 150.3 (C-2 C=O), 160.2 (C-4 C=O).

**3'-O-(1-methyl-21,21-dioxo-2,5,8,11,14,17,20-heptaoxa-21-thiadocos-1-yl)-5-iodo-5'-O-triisopropylsilyl-2'-deoxyuridine (14c).** Prepared from (13c) (0.950 g, 1.16 mmol). After column chromatography on silica gel (EtOAc) the pure product (14c) was obtained as a light yellow oil (0.681 g, 65%). *R<sub>f</sub>* 0.27 (EtOAc); <sup>1</sup>H NMR: δ 1.05-1.24 (21H, m, 3 x <sup>i</sup>Pr), 1.32 (3H, d, *J* 5.0, O[CHCH<sub>3</sub>]O), 1.93-2.18 (1H, m, H-2'), 2.37-2.55 (1H, m, H-2'), 3.08 (3H, s, OSO<sub>2</sub>CH<sub>3</sub>), 3.54-3.72 (20H, m, 5 x OCH<sub>2</sub>CH<sub>2</sub>O), 3.76 (2H, t, *J* 5.3, OCH<sub>2</sub>CH<sub>2</sub>OMs), 3.82-3.96 (2H, m, H-5'), 4.01-4.16 (1H, m, H-4'), 4.38 (2H, t, *J* 5.3, OCH<sub>2</sub>CH<sub>2</sub>OMs), 4.42-4.51 (1H, m, H-3'), 4.82 (1H, q, *J* = 5.0, O[CHCH<sub>3</sub>]O), 6.20 (dd, 1H, *J* 8.1, 5.8, H-1'), 8.04 (1H, s, H-6), 8.51 (1H, br s, NH); <sup>13</sup>C NMR: δ 11.9 (Si[CH(CH<sub>3</sub>)<sub>2</sub>]<sub>3</sub>), 18.2 (Si[CH(CH<sub>3</sub>)<sub>2</sub>]<sub>3</sub>), 20.0 (O[CHCH<sub>3</sub>]O), 37.8 (OSO<sub>2</sub>CH<sub>3</sub>), 39.6 (C-2'), 63.4 (C-5'), 63.7 (O[CHCH<sub>3</sub>]OCH<sub>2</sub>CH<sub>2</sub>), 68.6 (C-5), 69.0 (OCH<sub>2</sub>CH<sub>2</sub>OMs), 69.4 (OCH<sub>2</sub>CH<sub>2</sub>OMs), 70.5-70.6 (O[CHCH<sub>3</sub>]OCH<sub>2</sub>CH<sub>2</sub>, 4 x OCH<sub>2</sub>CH<sub>2</sub>O), 74.8 (C-3'), 85.6 (C-1'), 86.1 (C-4'), 99.4 (O[CHCH<sub>3</sub>]O), 144.1 (C-6), 150.0 (C-2 C=O), 160.1 (C-4 C=O).

**5-iodo-3'-O-(1-methyl-33,33-dioxo-2,5,8,11,14,17,20,23,26,29,32-undeca-33-thiatetra triacont -1-yl)-5'-O-triisopropylsilyl-2'-deoxyuridine (14d).** Prepared from (13d) (0.150 g, 0.15 mmol). After column chromatography on silica gel (EtOAc-DCM-EtOH, 46-46-8, v-v-v) the pure product (14d) was obtained as a light yellow oil (0.141 g, 87%). *R<sub>f</sub>* 0.35 (EtOAc-DCM-EtOH, 46-46-8, v-v-v); <sup>1</sup>H NMR: δ 1.04-1.26 (21H, m, 3 x <sup>i</sup>Pr), 1.33 (3H, d, *J* 5.0, O[CHCH<sub>3</sub>]O), 1.91-2.21 (1H, m, H-2'), 2.36-2.57 (1H, m, H-2'), 3.11 (3H, s, OSO<sub>2</sub>CH<sub>3</sub>), 3.52-3.75 (36H, m, 9 x OCH<sub>2</sub>CH<sub>2</sub>O), 3.78 (2H, t, *J* 5.2, OCH<sub>2</sub>CH<sub>2</sub>OMs), 3.80-3.94 (2H, m, H-5'), 4.01-4.16 (1H, m, H-4'), 4.40 (2H, t, *J* 5.2, OCH<sub>2</sub>CH<sub>2</sub>OMs), 4.44-4.53 (1H, m, H-3'), 4.86 (1H, q, *J* = 5.0, O[CHCH<sub>3</sub>]O), 6.21 (dd, 1H, *J* 8.1, 5.8, H-1'), 8.03 (1H, s, H-6), 8.55 (1H, br s, NH); <sup>13</sup>C NMR: δ 11.9 (Si[CH(CH<sub>3</sub>)<sub>2</sub>]<sub>3</sub>), 18.2 (Si[CH(CH<sub>3</sub>)<sub>2</sub>]<sub>3</sub>), 20.0 (O[CHCH<sub>3</sub>]O), 37.8 (OSO<sub>2</sub>CH<sub>3</sub>), 39.6 (C-2'), 63.3 (C-5'), 63.8 (O[CHCH<sub>3</sub>]OCH<sub>2</sub>CH<sub>2</sub>), 68.6 (C-5),

69.1 (OCH<sub>2</sub>CH<sub>2</sub>OMs), 69.4 (OCH<sub>2</sub>CH<sub>2</sub>OMs), 70.5-70.6 (O[CHCH<sub>3</sub>]OCH<sub>2</sub>CH<sub>2</sub>, 8 x OCH<sub>2</sub>CH<sub>2</sub>O), 74.7 (C-3'), 85.6 (C-1'), 86.0 (C-4'), 99.4 (O[CHCH<sub>3</sub>]O), 144.1 (C-6), 150.0 (C-2 C=O), 160.1 (C-4 C=O).

### General procedure for the preparation of compounds (15a-d)

To a solution of (**14a-d**) in anhydrous MeCN (20 mL / mmol) was added secondary amine (**5**) (1.5 equivalents). The mixture was stirred for different times at different temperatures (see details below) then poured into sat. aq. NaHCO<sub>3</sub> (160 mL / mmol) and extracted with DCM (3 x 50 mL / mmol). The organic layers were combined, dried over MgSO<sub>4</sub> and concentrated *in vacuo*.

**3'-O-(1-{2-[ethyl(2-[(6-iodoquinoxalin-2-yl)carbonyl]amino)ethyl]amino}ethoxy)ethyl)-5-iodo-5'-O-triisopropylsilyl-2'-deoxyuridine (15a).** Prepared from (**14a**) (1.244 g, 1.84 mmol). Time of reaction: 88 h, temperature: 55 °C. After column chromatography on silica gel (EtOAc-EOH-NH<sub>4</sub>OH, 95-5-0.5, v-v-v) the pure product (**15a**) was obtained as a light brown foam (0.265 g, 15%). *R<sub>f</sub>* 0.29 (EtOAc-EOH-NH<sub>4</sub>OH, 95-5-0.5, v-v-v); <sup>1</sup>H NMR: δ 1.08-1.16 (24H, m, 3 x <sup>i</sup>Pr, NCH<sub>2</sub>CH<sub>3</sub>), 1.30 (3H, d, *J* 5.0, O[CHCH<sub>3</sub>]O), 1.96-2.04 (1H, m, H-2'), 2.39-2.44 (1H, m, H-2'), 2.65-2.82 (6H, m, 3 x NCH<sub>2</sub>), 3.51-3.85 (4H, m, OCH<sub>2</sub>CH<sub>2</sub>N, NCH<sub>2</sub>CH<sub>2</sub>NH), 3.87-3.98 (2H, m, H-5'), 4.04-4.10 (1H, m, H-4'), 4.38-4.44 (1H, m, H-3'), 4.78 (1H, q, *J* = 5.0, O[CHCH<sub>3</sub>]O), 6.17 (1H, q, *J* = 7.8, 5.2, H-1'), 7.80 (1H, d, *J* 8.8, ArH '*m*' to I), 7.96-8.09 (2H, m, H-6, ArH '*o*' to I), 8.38 (1H, br s, ArCONH), 8.60 (d, 1H, *J* 1.8, ArH '*o*' to I), 9.63 (1H, s, ArH '*o*' to CONH); <sup>13</sup>C NMR: δ 12.0 (Si[CH(CH<sub>3</sub>)<sub>2</sub>]<sub>3</sub>, NCH<sub>2</sub>CH<sub>3</sub>), 18.3 (Si[CH(CH<sub>3</sub>)<sub>2</sub>]<sub>3</sub>), 20.2 (O[CHCH<sub>3</sub>]O), 37.5 (NCH<sub>2</sub>CH<sub>2</sub>NH), 39.7 (C-2'), 48.7 (NCH<sub>2</sub>CH<sub>3</sub>), 52.9, 53.2 (OCH<sub>2</sub>CH<sub>2</sub>N, NCH<sub>2</sub>CH<sub>2</sub>NH), 63.1, 63.5 (C-5', OCH<sub>2</sub>CH<sub>2</sub>N), 68.7 (C-5), 75.0 (C-3'), 85.8 (C-1'), 86.4 (C-4'), 98.2 (ArCI), 99.5 (O[CHCH<sub>3</sub>]O), 130.8 (ArCH '*m*' to I), 138.7 (ArCH '*β*' to N), 139.6 (ArC '*p*' to I), 139.9 (ArCH '*o*' to I), 144.1 (C-6), 144.2, 144.5 (ArCCONH, ArC '*m*' to I), 144.8 (ArCH '*o*' to CONH), 149.9 (C-2 C=O), 160.0 (C-4 C=O), 163.2 (ArCONH).

**3'-O-(1-{2-[ethyl(2-[(6-iodoquinoxalin-2-yl)carbonyl]amino)ethyl]amino}ethoxy)-1-methylethyl)-5-iodo-5'-O-triisopropylsilyl-2'-deoxyuridine (15b).** Prepared from (**14b**) (0.629 g, 0.91

mmol). Time of reaction: 96 h, temperature: 50 °C. After column chromatography on silica gel (EtOAc-EOH-NH<sub>4</sub>OH, 96-4-0.5, v-v-v) the pure product (**15b**) was obtained as a light brown foam (0.134 g, 15%). *R<sub>f</sub>* 0.30 (EtOAc-EOH-NH<sub>4</sub>OH, 95-5-0.5, v-v-v); <sup>1</sup>H NMR: δ 1.09-1.29 (24H, m, 3 x <sup>i</sup>Pr, NCH<sub>2</sub>CH<sub>3</sub>), 1.33 (6H, s, O[C(CH<sub>3</sub>)<sub>2</sub>]O), 1.93-2.00 (1H, m, H-2'), 2.31-2.40 (1H, m, H-2'), 2.60-2.79 (6H, m, 3 x NCH<sub>2</sub>), 3.47-3.61 (4H, m, OCH<sub>2</sub>CH<sub>2</sub>N, NCH<sub>2</sub>CH<sub>2</sub>NH), 3.80-3.98 (2H, m, H-5'), 4.07-4.08 (1H, m, H-4'), 4.54 (1H, d, *J* 5.7, H-3'), 6.22 (1H, q, *J* = 8.7, 5.1, H-1'), 7.82 (1H, d, *J* 8.8, ArH 'm' to I), 8.03 (1H, s, H-6), 8.09 (1H, dd, *J* 8.8, 1.9, ArH 'o' to I), 8.35 (1H, br s, ArCONH), 8.62 (d, 1H, *J* 1.9, ArH 'o' to I), 9.65 (1H, s, ArH 'o' to CONH); <sup>13</sup>C NMR: δ 12.0 (Si[CH(CH<sub>3</sub>)<sub>2</sub>]<sub>3</sub>), 12.3 (NCH<sub>2</sub>CH<sub>3</sub>), 18.3 (Si[CH(CH<sub>3</sub>)<sub>2</sub>]<sub>3</sub>), 25.6, 25.9 (O[C(CH<sub>3</sub>)<sub>2</sub>]O), 37.5 (NCH<sub>2</sub>CH<sub>2</sub>NH), 40.8 (C-2'), 48.8 (NCH<sub>2</sub>CH<sub>3</sub>), 53.1, 53.4 (OCH<sub>2</sub>CH<sub>2</sub>N, NCH<sub>2</sub>CH<sub>2</sub>NH), 60.1 (OCH<sub>2</sub>CH<sub>2</sub>N), 63.7 (C-5'), 68.7 (C-5), 71.1 (C-3'), 85.9 (C-1'), 87.3 (C-4'), 98.1 (ArCl), 101.1 (O[C(CH<sub>3</sub>)<sub>2</sub>]O), 130.8 (ArCH 'm' to I), 138.7 (ArCH 'β' to N), 139.6 (ArC 'p' to I), 139.9 (ArCH 'o' to I), 144.2 (C-6), 144.2, 144.5 (ArCCONH, ArC 'm' to I), 144.8 (ArCH 'o' to CONH), 150.0 (C-2 C=O), 160.0 (C-4 C=O), 163.0 (ArCONH).

**3'-O-[20-ethyl-24-(6-iodoquinoxalin-2-yl)-1-methyl-24-oxo-2,5,8,11,14,17-hexaoxa-20,23-diazatetracos-1-yl]-5-iodo-5'-O-triisopropylsilyl-2'-deoxyuridine (15c).** Prepared from (**14c**) (0.442 g, 0.49 mmol). Time of reaction: 90 h, temperature : 60 °C. After column chromatography on silica gel (DCM-EtOH-NH<sub>4</sub>OH, 92-8-0.5) the pure product (**15c**) was obtained as a brown caramel (0.170 g, 30%). *R<sub>f</sub>* 0.29 (DCM-EtOH-NH<sub>4</sub>OH, 92-8-0.5); <sup>1</sup>H NMR: δ 0.96-1.25 (24H, m, 3 x <sup>i</sup>Pr, NCH<sub>2</sub>CH<sub>3</sub>), 1.28 (3H, d, *J* 5.0, O[CHCH<sub>3</sub>]O), 1.86-2.11 (1H, m, H-2'), 2.35-2.50 (1H, m, H-2'), 2.60-2.80 (6H, m, 3 x NCH<sub>2</sub>), 3.32-3.67 (24H, m, 5 x OCH<sub>2</sub>CH<sub>2</sub>O, OCH<sub>2</sub>CH<sub>2</sub>N, NCH<sub>2</sub>CH<sub>2</sub>NH), 3.78-4.10 (3H, m, H-4', H-5'), 4.37-4.46 (1H, m, H-3'), 4.78 (1H, q, *J* = 5.0, O[CHCH<sub>3</sub>]O), 6.20 (1H, dd, *J* = 8.0, 5.8, H-1'), 7.78 (1H, d, *J* 8.8, ArH 'm' to I), 7.97 (1H, s, H-6), 8.03 (1H, dd, *J* 8.8, 1.9, ArH 'o' to I), 8.40 (1H, br s, ArCONH), 8.56 (d, 1H, *J* 1.9, ArH 'o' to I), 9.61 (1H, s, ArH 'o' to CONH); <sup>13</sup>C NMR: δ 11.7 (Si[CH(CH<sub>3</sub>)<sub>2</sub>]<sub>3</sub>), 17.3 (NCH<sub>2</sub>CH<sub>3</sub>), 18.2 (Si[CH(CH<sub>3</sub>)<sub>2</sub>]<sub>3</sub>), 20.0 (O[CHCH<sub>3</sub>]O), 37.5 (NCH<sub>2</sub>CH<sub>2</sub>NH), 39.6 (C-2'), 48.5 (NCH<sub>2</sub>CH<sub>3</sub>), 52.8, 52.9 (OCH<sub>2</sub>CH<sub>2</sub>N, NCH<sub>2</sub>CH<sub>2</sub>NH), 63.3 (C-5'), 63.7 (OCH<sub>2</sub>CH<sub>2</sub>N),

68.7 (C-5), 68.6-68.8 (O[CHCH<sub>3</sub>]OCH<sub>2</sub>CH<sub>2</sub>, OCH<sub>2</sub>CH<sub>2</sub>N, 4 x OCH<sub>2</sub>CH<sub>2</sub>O), 75.0 (C-3'), 85.5 (C-1'), 86.1 (C-4'), 98.0 (ArCl), 99.4 (O[CHCH<sub>3</sub>]O), 130.9 (ArCH 'm' to I), 138.6 (ArCH 'β' to N), 139.6 (ArC 'p' to I), 139.7 (ArCH 'o' to I), 144.0 (C-6), 144.2, 144.3 (ArCCONH, ArC 'm' to I), 144.7 (ArCH 'o' to CONH), 150.0 (C-2 C=O), 160.2 (C-4 C=O), 163.0 (ArCONH).

**3'-O-[32-ethyl-36-(6-iodoquinoxalin-2-yl)-1-methyl-36-oxo-2,5,8,11,14,17,20,23,26,29-decaoxa-32,35-diazahexatriacont-1-yl]-5-iodo-5'-O-triisopropylsilyl-2'-deoxyuridine (15d).** Prepared from (14d) (0.141 g, 0.13 mmol). Time of reaction: 70 h, temperature : 70 °C. After column chromatography on silica gel (EtOAc-DCM-EtOH-NH<sub>4</sub>OH, 20-67-13-0.5) the pure product (15d) was obtained as a brown caramel (0.022 g, 12%). *R<sub>f</sub>* 0.28 (EtOAc-DCM-EtOH-NH<sub>4</sub>OH, 20-67-13-0.5); <sup>1</sup>H NMR: δ 0.94-1.27 (24H, m, 3 x <sup>i</sup>Pr, NCH<sub>2</sub>CH<sub>3</sub>), 1.30 (3H, d, *J* 5.0, O[CHCH<sub>3</sub>]O), 1.84-2.13 (1H, m, H-2'), 2.34-2.52 (1H, m, H-2'), 2.62-2.82 (6H, m, 3 x NCH<sub>2</sub>), 3.31-3.65 (40H, m, 9 x OCH<sub>2</sub>CH<sub>2</sub>O, OCH<sub>2</sub>CH<sub>2</sub>N, NCH<sub>2</sub>CH<sub>2</sub>NH), 3.76-4.12 (3H, m, H-4', H-5'), 4.35-4.46 (1H, m, H-3'), 4.81 (1H, q, *J* = 5.0, O[CHCH<sub>3</sub>]O), 6.22 (1H, dd, *J* = 7.8, 5.9, H-1'), 7.79 (1H, d, *J* 8.9, ArH 'm' to I), 7.96 (1H, s, H-6), 8.04 (1H, dd, *J* 8.9, 1.8, ArH 'o' to I), 8.42 (1H, br s, ArCONH), 8.58 (d, 1H, *J* 1.8, ArH 'o' to I), 9.62 (1H, s, ArH 'o' to CONH); <sup>13</sup>C NMR: δ 11.9 (Si[CH(CH<sub>3</sub>)<sub>2</sub>]<sub>3</sub>), 17.3 (NCH<sub>2</sub>CH<sub>3</sub>), 18.2 (Si[CH(CH<sub>3</sub>)<sub>2</sub>]<sub>3</sub>), 20.1 (O[CHCH<sub>3</sub>]O), 37.4 (NCH<sub>2</sub>CH<sub>2</sub>NH), 39.6 (C-2'), 48.5 (NCH<sub>2</sub>CH<sub>3</sub>), 52.6, 52.7 (OCH<sub>2</sub>CH<sub>2</sub>N, NCH<sub>2</sub>CH<sub>2</sub>NH), 63.3 (C-5'), 63.7 (OCH<sub>2</sub>CH<sub>2</sub>N), 68.6 (C-5), 69.9-71.1 (O[CHCH<sub>3</sub>]OCH<sub>2</sub>CH<sub>2</sub>, OCH<sub>2</sub>CH<sub>2</sub>N, 8 x OCH<sub>2</sub>CH<sub>2</sub>O), 74.9 (C-3'), 85.5 (C-1'), 86.0 (C-4'), 97.9 (ArCl), 99.3 (O[CHCH<sub>3</sub>]O), 130.8 (ArCH 'm' to I), 138.6 (ArCH 'β' to N), 139.6 (ArC 'p' to I), 139.7 (ArCH 'o' to I), 144.0 (C-6), 144.2, 144.3 (ArCCONH, ArC 'm' to I), 144.8 (ArCH 'o' to CONH), 150.1 (C-2 C=O), 160.2 (C-4 C=O), 163.0 (ArCONH).

### Synthesis of the tertiary amine precursors (18-19).

**tert-butyl 2-bromoethylcarbamate (16).** To a stirred solution of bromoethylamine bromhydrate (4 g, 19.52 mmol) and DIPEA (9.8 mL, 56.04 mmol) in anhydrous DCM (100 mL) was added Boc<sub>2</sub>O (4.26 g, 19.52 mmol). The mixture was stirred for 15 h at rt and concentrated *in vacuo* to give a white solid.

Et<sub>2</sub>O (100 mL) was added and the suspension was filtered. The white solid was rinsed with Et<sub>2</sub>O (2 x 20 mL), the filtrates were combined and concentrated *in vacuo* to give a clear oil. After column chromatography on silica gel (EtOAc-cyclohexane, 20-80, v-v) the pure product (**14**) was obtained as a colourless oil (1.971 g, 45%). *R*<sub>f</sub> 0.32 (EtOAc-cyclohexane, 20-80, v-v); <sup>1</sup>H NMR: δ 1.45 (9H, s, <sup>t</sup>Bu), 3.41-3.57 (4H, m, BrCH<sub>2</sub>CH<sub>2</sub>NH), 5.29 (1H, br s, NH); <sup>13</sup>C NMR: δ 28.5 (C[CH<sub>3</sub>]<sub>3</sub>), 33.0 (BrCH<sub>2</sub>), 42.5 (CH<sub>2</sub>NH), 80.0 (C[CH<sub>3</sub>]<sub>3</sub>), 155.7 (CONH).

**tert-butyl 2-[ethyl-(2-[(6-iodoquinoxalin-2-yl)carbonyl]amino)ethyl]amino]ethylcarbamate (17).** To a suspension of secondary amine (**5**) (500 mg, 1.35 mmol) in anhydrous MeCN (10 mL) was added (**16**) (908 mg, 4.05 mmol). The mixture was stirred for 96 h at rt then poured into 5% aq. Na<sub>2</sub>CO<sub>3</sub> which was extracted with DCM (3 x 20 mL). The organic layers were combined, dried over MgSO<sub>4</sub> and concentrated *in vacuo* to give a dark oil. After column chromatography on silica gel (EtOAc-cyclohexane-NEt<sub>3</sub>, 90-10-2, v-v-v) the pure product (**17**) was obtained as a brown oil (370 mg, 53%). *R*<sub>f</sub> 0.30 (EtOAc-cyclohexane-NEt<sub>3</sub>, 90-10-2, v-v-v); <sup>1</sup>H NMR: δ 0.99 (3H, t, *J* 6.8, NCH<sub>2</sub>CH<sub>3</sub>), 1.28 (9H, s, <sup>t</sup>Bu), 2.51-2.62 (4H, m, NCH<sub>2</sub>CH<sub>3</sub>, NCH<sub>2</sub>CH<sub>2</sub>NH), 2.66 (2H, t, *J* 5.9, ArCONHCH<sub>2</sub>CH<sub>2</sub>), 3.13 (2H, q, *J* 6.1, NCH<sub>2</sub>CH<sub>2</sub>NH), 4.03 (q, 2H, *J* 5.9, ArCONHCH<sub>2</sub>CH<sub>2</sub>), 5.24 (1H, br s, NHCO<sup>t</sup>Bu), 7.78 (1H, d, *J* 8.8, ArCH '*m*' to I), 7.97 (1H, dd, *J* 8.8, 1.2, ArCH '*o*' to I), 8.26 (1H, t, *J* 5.0, ArCONH), 8.50 (1H, d, *J* 1.2, ArCH '*o*' to I), 9.55 (1H, s, ArCH '*o*' to CONH); <sup>13</sup>C NMR: δ 11.9 (NCH<sub>2</sub>CH<sub>3</sub>), 28.3 (C[CH<sub>3</sub>]<sub>3</sub>), 37.3 (ArCONHCH<sub>2</sub>), 38.8 (NCH<sub>2</sub>CH<sub>2</sub>NHCO<sup>t</sup>Bu), 47.6 (NCH<sub>2</sub>CH<sub>3</sub>), 52.5 (NCH<sub>2</sub>CH<sub>2</sub>NHCO<sup>t</sup>Bu), 53.0 (ArCONHCH<sub>2</sub>CH<sub>2</sub>), 79.1 (C[CH<sub>3</sub>]<sub>3</sub>), 98.0 (ArCl), 130.8 (ArCH '*m*' to I), 138.4 (ArCH '*β*' to N), 139.4 (ArC '*p*' to I), 139.6 (ArCH '*o*' to I), 143.9 (ArCCONH), 144.3 (ArC '*m*' to I), 144.6 (ArCH '*o*' to CONH), 156.0 (NHCO<sup>t</sup>Bu), 162.8 (ArCONH).

***N*-[2-[ethyl(2-aminoethyl)amino]ethyl]-6-iodoquinoxaline-2-carboxamide (18).** To a solution of (**17**) (370 mg, 0.72 mmol) in anhydrous DCM (7.4 mL) was added TFA (3.7 mL). The mixture was stirred for 1 h 30 at rt then poured into 5% aq. Na<sub>2</sub>CO<sub>3</sub>. Layers were separated and the aqueous layer was extracted with DCM (2 x 60 mL). The organic layers were combined, dried over MgSO<sub>4</sub> and



concentrated *in vacuo* to give an orange semi-solid (285 mg, 96%). This crude product was used for the next step without further purification.  $^1\text{H}$  NMR:  $\delta$  1.08 (3H, t,  $J$  7.1,  $\text{NCH}_2\text{CH}_3$ ), 1.68 (2H, br s,  $\text{NH}_2$ ), 2.57-2.83 (8H, m, 3 x  $\text{NCH}_2$ ,  $\text{CH}_2\text{NH}_2$ ), 3.58 (2H, q,  $J$  5.8,  $\text{ArCONHCH}_2\text{CH}_2$ ), 7.79 (1H, d,  $J$  8.9,  $\text{ArCH}$  'm' to I), 8.06 (1H, dd,  $J$  8.9, 1.9,  $\text{ArCH}$  'o' to I), 8.48 (1H, br s,  $\text{ArCONH}$ ), 8.60 (1H, d,  $J$  1.9,  $\text{ArCH}$  'o' to I), 9.64 (1H, s,  $\text{ArCH}$  'o' to CONH);  $^{13}\text{C}$  NMR:  $\delta$  11.8 ( $\text{NCH}_2\text{CH}_3$ ), 37.4 ( $\text{ArCONHCH}_2$ ), 39.8 ( $\text{NCH}_2\text{CH}_2\text{NH}_2$ ), 47.5 ( $\text{NCH}_2\text{CH}_3$ ), 52.3 ( $\text{ArCONHCH}_2\text{CH}_2$ ), 56.4 ( $\text{NCH}_2\text{CH}_2\text{NH}_2$ ), 98.0 ( $\text{ArCl}$ ), 130.6 ( $\text{ArCH}$  'm' to I), 138.4 ( $\text{ArCH}$  ' $\beta$ ' to N), 139.4 ( $\text{ArC}$  'p' to I), 139.6 ( $\text{ArCH}$  'o' to I), 144.0, 144.3 ( $\text{ArCCONH}$ ,  $\text{ArC}$  'm' to I), 144.5 ( $\text{ArCH}$  'o' to CONH), 162.8 ( $\text{ArCONH}$ ).

***N*-{2-[ethyl(2-hydroxyethyl)amino]ethyl}-6-iodoquinoxaline-2-carboxamide (19).** To a suspension of secondary amine (**5**) (200 mg, 0.54 mmol) in anhydrous MeCN (4 mL) were added DIPEA (65  $\mu\text{L}$ , 0.65 mmol) and 2-bromoethanol (46  $\mu\text{L}$ , 0.65 mmol). The mixture was stirred for 48 h at reflux then poured into 5% aq.  $\text{Na}_2\text{CO}_3$  and extracted with DCM (3 x 15 mL). The organic layers were combined, dried over  $\text{MgSO}_4$  and concentrated *in vacuo* to give a dark oil. After column chromatography on silica gel (EtOAc-EtOH- $\text{NH}_4\text{OH}$ , 90-10-1, v-v-v) the pure product (**19**) was obtained as a thick brown oil (138 mg, 62%).  $R_f$  0.22 (EtOAc-EtOH- $\text{NH}_4\text{OH}$ , 90-10-1, v-v-v);  $^1\text{H}$  NMR:  $\delta$  1.08 (3H, t,  $J$  6.8,  $\text{NCH}_2\text{CH}_3$ ), 2.04 (1H, br s, OH), 2.67-2.82 (6H, m, 3 x  $\text{NCH}_2$ ), 3.60-3.66 (4H, m,  $\text{NHCH}_2\text{CH}_2\text{N}$ ,  $\text{CH}_2\text{OH}$ ), 7.82 (1H, d,  $J$  8.8,  $\text{ArCH}$  'm' to I), 8.07 (1H, dd,  $J$  = 8.8, 1.5,  $\text{ArCH}$  'o' to I), 8.28 (1H, br s, NH), 8.61 (1H, d,  $J$  1.5,  $\text{ArCH}$  'o' to I), 9.63 (1H, s,  $\text{ArCH}$  'o' to CONH);  $^{13}\text{C}$  NMR:  $\delta$  11.9 ( $\text{NCH}_2\text{CH}_3$ ), 37.6 ( $\text{CONHCH}_2$ ), 47.7 ( $\text{NCH}_2\text{CH}_3$ ), 52.6 ( $\text{NHCH}_2\text{CH}_2\text{N}$ ), 55.7 ( $\text{NCH}_2\text{CH}_2\text{OH}$ ), 59.2 ( $\text{CH}_2\text{OH}$ ), 98.2 ( $\text{ArCl}$ ), 130.8 ( $\text{ArCH}$  'm' to I), 138.6 ( $\text{ArCH}$  ' $\beta$ ' to N), 139.5 ( $\text{ArC}$  'p' to I), 139.9 ( $\text{ArCH}$  'o' to I), 143.9 ( $\text{ArCCONH}$ ), 144.5 ( $\text{ArC}$  'm' to I), 144.6 ( $\text{ArCH}$  'o' to CONH), 163.1 ( $\text{ArCONH}$ );  $m/z$  (ESI) 415.10 [ $\text{M}+\text{H}$ ] $^+$ .



## Metabolic Stability

**Table S1** Metabolic profile of conjugates (**1**)<sup>a</sup>

| S9 Liver fraction    |                     | Liver microsomes     |                     |
|----------------------|---------------------|----------------------|---------------------|
| Retention time (min) | Relative amount (%) | Retention time (min) | Relative amount (%) |
| 15.4                 | 0.6                 | 15.4                 | 0.5                 |
| 16.0                 | 14.7                | 16.0                 | 15.1                |
| 16.7                 | 5.0                 | 16.7                 | 5.0                 |
| 17.5                 | 16.7                | 17.5                 | 19.5                |
| 17.9                 | 59.8                | 17.9                 | 55.9                |
| 20.1                 | 1.4                 | 20.1                 | 1.9                 |

<sup>a</sup> Conjugate (500  $\mu$ M) was incubated at 37°C for 4h.
